# Supplementary material for: Predicting postural control adaptation measuring EEG, EMG, and center of pressure changes: BioVRSea paradigm
Source: Frontiers journal article supplement (doi:10.3389/fnhum.2022.1038976), 2022-12-15
Supplement: Data_Sheet_1.PDF [file Data_Sheet_1.PDF]

## Supplementary Material

### 1 Supplementary Figures and Tables

#### 1.1 Supplementary Figures

| Feature                                                       | Formula                                                            |                                                                                                     |
|---------------------------------------------------------------|--------------------------------------------------------------------|-----------------------------------------------------------------------------------------------------|
| Average Amplitude Change (AAC)                                | $AAC = \frac{1}{N} \cdot \sum_{i=1}^{N-1}  x_{i+1} - x_i $         |                                                                                                     |
| Average Energy (AE)                                           | $AE = \frac{1}{N} \cdot \sum_{i=1}^N (x_i)^2$                      |                                                                                                     |
| Absolute Value of the Summation of the Exponential Root (ASM) | $ASM = \frac{1}{N} \cdot \sum_{i=1}^N  (x_i)^p $                   | $p = \begin{cases} 0.5 & \text{if } 0.25N \leq i \leq 0.75N \\ 0.75 & \text{otherwise} \end{cases}$ |
| Absolute Value of the Summation of Square Root (ASS)          | $ASS = \sum_{i=1}^N \sqrt{ x_i }$                                  |                                                                                                     |
| Coefficient of Variation (CV)                                 | $CV = \frac{SD}{\bar{x}}$                                          |                                                                                                     |
| Difference Absolute Mean Value (DAMV)                         | $DAMV = \frac{\sum_{i=1}^{N-1}  x_{i+1} - x_i }{N - 1}$            |                                                                                                     |
| Difference Absolute Standard Deviation Value (DASDV)          | $DASDV = \sqrt{\frac{\sum_{i=1}^{N-1} (x_{i+1} - x_i)^2}{N - 1}}$  |                                                                                                     |
| Difference Variance Value (DVARV)                             | $DVARV = \frac{1}{N - 2} \cdot \sum_{i=1}^{N-1} (x_{i+1} - x_i)^2$ |                                                                                                     |
| <del>Enhanced mean absolute value</del> (EMAV)                | $EMAV = \frac{1}{N} \cdot \sum_{i=1}^N  (x_i)^p $                  | $p = \begin{cases} 0.75 & \text{if } 0.2N \leq i \leq 0.8N \\ 0.5 & \text{otherwise} \end{cases}$   |
| <del>Enhanced wavelength</del> (EWL)                          | $EWL = \sum_{i=2}^N  (x_i - x_{i-1})^p $                           | $p = \begin{cases} 0.75 & \text{if } 0.2N \leq i \leq 0.8N \\ 0.5 & \text{otherwise} \end{cases}$   |
| New Zero Crossing (FZC)                                       | $FZC = \sum_{i=1}^{N-1} w_i$                                       | $T = \frac{2}{5} \cdot \sum_{i=1}^{10} x_i$                                                         |

| Feature                                   | Formula                                                                     |                                                                                                                                                            |
|-------------------------------------------|-----------------------------------------------------------------------------|------------------------------------------------------------------------------------------------------------------------------------------------------------|
|                                           |                                                                             | $w_i = \begin{cases} 1 & \text{if } x_i > T \text{ \& } x_{i+1} < T \\ 1 & \text{if } x_i < T \text{ \& } x_{i+1} > T \\ 0 & \text{otherwise} \end{cases}$ |
| Kurtosis (KURT)                           | $KURT = \frac{\sigma^4}{SD^4}$                                              |                                                                                                                                                            |
| Integrated EMG (IEMG)                     | $IEMG = \sum_{i=1}^N  x_i $                                                 |                                                                                                                                                            |
| Interquartile Range (IQR)                 | $IQR = Q_3 - Q_1$                                                           |                                                                                                                                                            |
| Log CV (LCV)                              | $LCOV = \log(COV)$                                                          |                                                                                                                                                            |
| Log detector (LD)                         | $LD = \exp\left(\frac{1}{N} \cdot \sum_{i=1}^N \log x_i \right)$            |                                                                                                                                                            |
| Log DAMV (LDAMV)                          | $LDAMV = \log(DAMV)$                                                        |                                                                                                                                                            |
| Log DASDV (LDASDV)                        | $LDASDV = \log(DASDV)$                                                      |                                                                                                                                                            |
| Log Teager Kaiser Energy Operator (LTKEO) | $LTKEO = \log\left(\sum_{i=2}^{N-1} (x_i)^2 - x_{i-1} \cdot x_{i+1}\right)$ |                                                                                                                                                            |
| Mean Absolute Deviation (MAD)             | $MAD = \frac{1}{N} \cdot \sum_{i=1}^N  x_i - \bar{x} $                      |                                                                                                                                                            |
| Mean Absolute Value (MAV)                 | $MAV = \frac{1}{N} \cdot \sum_{i=1}^N  x_i $                                |                                                                                                                                                            |
| Maximum Fractal Length (MFL)              | $MFL = \log\left(\sqrt{\sum_{i=1}^{N-1} (x_{i+1} - x_i)^2}\right)$          |                                                                                                                                                            |
| Modified Mean Absolute Value (MMAV)       | $MMAV = \frac{1}{N} \cdot \sum_{i=1}^N w_i \cdot  x_i $                     | $w_i = \begin{cases} 1 & \text{if } 0.25N \leq i \leq 0.75N \\ 0.5 & \text{otherwise} \end{cases}$                                                         |

| Feature                                | Formula                                                          |                                                                                                                                                        |
|----------------------------------------|------------------------------------------------------------------|--------------------------------------------------------------------------------------------------------------------------------------------------------|
| Modified Mean Absolute Value 2 (MMAV2) | $MMAV2 = \frac{1}{N} \cdot \sum_{i=1}^N w_i \cdot  x_i $         | $w_i = \begin{cases} 1 & \text{if } 0.25N \leq i \leq 0.75N \\ \frac{4i}{N} & \text{if } i < 0.25N \\ \frac{4(i-N)}{N} & \text{otherwise} \end{cases}$ |
| Mean Value of the Square Root (MSR)    | $MSR = \frac{1}{N} \cdot \sum_{i=1}^N \sqrt{x_i}$                |                                                                                                                                                        |
| Root Mean Square (RMS)                 | $RMS = \sqrt{\frac{1}{N} \cdot \sum_{i=1}^N (x_i)^2}$            |                                                                                                                                                        |
| Standard Deviation (SD)                | $SD = \sqrt{\frac{1}{N-1} \cdot \sum_{i=1}^N (x_i - \bar{x})^2}$ |                                                                                                                                                        |
| Skewness (SKEW)                        | $SKEW = \frac{\sum_{i=1}^N (x_i - \bar{x})^3}{(N-1) \cdot SD^3}$ |                                                                                                                                                        |
| Single Square Integral (SSI)           | $SSI = \sum_{i=1}^N (x_i)^2$                                     |                                                                                                                                                        |
| Absolute Value of Temporal Moment (TM) | $TM = \frac{1}{N} \cdot \sum_{i=1}^N  (x_i)^p $                  | $p \in N$<br><i>commonly</i> $p = 3$                                                                                                                   |
| Variance (VAR)                         | $VAR = \frac{1}{N-1} \cdot \sum_{i=1}^N (x_i - \bar{x})^2$       |                                                                                                                                                        |
| Variance of EMG (VARE)                 | $VARE = \frac{1}{N-1} \cdot \sum_{i=1}^N (x_i)^2$                |                                                                                                                                                        |
| Variance Order (VO)                    | $VO = \sqrt{\frac{1}{N} \cdot \sum_{i=1}^N (x_i)^p}$             | $p \in N$<br><i>commonly</i> $p = 2$                                                                                                                   |
| Waveform Length (WL)                   | $WL = \sum_{i=2}^N  x_i - x_{i-1} $                              |                                                                                                                                                        |

| Feature                           | Formula                                                                   |
|-----------------------------------|---------------------------------------------------------------------------|
| Power ( $p_i$ )                   | $p_i = \frac{1}{M} \cdot (X_i)^2$                                         |
| Mean Frequency ( $F_{MN}$ )       | $F_{MN} = \frac{\sum_{i=1}^M f_i \cdot p_i}{\sum_{i=1}^M p_i}$            |
| Median Frequency ( $F_{MD}$ )     | $F_{MD} = \frac{1}{2} \cdot \sum_{i=1}^M p_i$                             |
| Total Power ( $P_T$ )             | $P_T = \sum_{i=1}^M p_i$                                                  |
| Mean Power ( $P_{MN}$ )           | $P_{MN} = \frac{1}{M} \cdot \sum_{i=1}^M p_i$                             |
| Peak Power ( $P_{max}$ )          | $P_{max} = \max(p_i)$                                                     |
| Peak Frequency ( $F_{max}$ )      | $F_{max} = \max(f_i)$                                                     |
| Kurtosis Frequency ( $F_{kurt}$ ) | $F_{kurt} = \frac{(F_{MN})^4}{(F_{SD})^4}$                                |
| Skewness Frequency ( $F_{skew}$ ) | $F_{skew} = \frac{\sum_{i=1}^M (f_i - F_{MN})^3}{(M - 1) \cdot F_{SD}^3}$ |

Supplementary Figure S1. List of all EMG features

## 1.2 Supplementary Tables

Supplementary Table S1. List of all CoP features

| Feature Name | Description                                                                              | Units |
|--------------|------------------------------------------------------------------------------------------|-------|
| TOTEX        | Summation over the elementary movement between consecutive samples on the support plane. | cm    |
| TOTEX_ML     | Summation over the elementary movement between consecutive samples on the ML axis.       | cm    |
| TOTEX_AP     | Summation over the elementary movement between consecutive samples on the AP axis.       | cm    |
| RD           | Summation of the square root distance between a point at time t and the plane origin.    | cm    |
| MDIST_ML     | Mean of the distance of points with respect to the origin along the ML axis.             | cm    |
| MDIST_AP     | Mean of the distance of points with respect to the origin along the AP axis.             | cm    |
| MVELO        | Mean Velocity of points on the support plane, computed as TOTEX / Total Time.            | cm/s  |
| MVELO_ML     | Mean Velocity of points on the ML axis, computed as TOTEX_ML / Total Time.               | cm/s  |
| MVELO_AP     | Mean Velocity of points on the AP axis, computed as TOTEX_AP / Total Time.               | cm/s  |

|                        |                                                                                                  |                 |
|------------------------|--------------------------------------------------------------------------------------------------|-----------------|
| RDIST                  | Squared Root Mean Distance of points on the support plane with respect to the origin.            | cm              |
| RDIST_ML               | Squared Root Mean Distance of points on ML axis with respect to the origin.                      | cm              |
| RDIST_AP               | Squared Root Mean Distance of points on AP axis with respect to the origin.                      | cm              |
| ML SampEn              | Sample Entropy computed on ML axis                                                               | nats            |
| AP SampEn              | Sample Entropy computed on AP axis                                                               | nats            |
| ML CI                  | Summation of SampEn computed with increasing time scale on ML axis.                              | nats            |
| AP CI                  | Summation of SampEn computed with increasing time scale on AP axis.                              | nats            |
| Ellipse Area           | Area of the 95% confidence ellipse.                                                              | cm <sup>2</sup> |
| EllipseAngle           | Angle between main axis of the 95% confidence ellipse and ML axis.                               | deg             |
| EllipseMainAxisLength  | Length of the Main Axis of the 95% confidence ellipse.                                           | cm              |
| EllipseMinorAxisLength | Length of the Minor Axis of the 95% confidence ellipse.                                          | cm              |
| SD AP                  | Standard deviation of points on the AP axis                                                      | cm              |
| SD ML                  | Standard deviation of points on the ML axis                                                      | cm              |
| SD Magnitude           | Standard deviation of the distance of points with respect to the origin                          | cm              |
| SD Direction           | Standard deviation of the angle difference between successive points with respect to the ML axis | deg             |
| Magnitude Entropy      | SampleEntropy of the distance of points with respect to the origin                               | nats            |
| Direction Entropy      | SampleEntropy of the angle difference between successive points with respect to the ML axis      | nats            |
| Multivariate CI        | Summation of SampEn computed with increasing time scale on the multivariate ML-AP series.        | nats            |
| AnteroMagnitude        | Magnitude of the furthest point in the anterior portion of the plane.                            | cm              |
| AnteroAngle            | Angle of the furthest point in the anterior portion of the plane.                                | deg             |
| PosteroMagnitude       | Magnitude of the furthest point in the posterior portion of the plane.                           | cm              |
| PosteroAngle           | Angle of the furthest point in the posterior portion of the plane.                               | deg             |
| LeftMagnitude          | Magnitude of the furthest point in the left portion of the plane.                                | cm              |
| LeftAngle              | Angle of the furthest point in the left portion of the plane.                                    | deg             |
| RightMagnitude         | Magnitude of the furthest point in the right portion of the plane.                               | cm              |
| RightAngle             | Angle of the furthest point in the right portion of the plane.                                   | deg             |
